# Supplementary material
Source: HighWire-hosted journal article supplement (http://molpharm.aspetjournals.org/highwire/filestream/76934/field_highwire_adjunct_files/1/Supplfig2.pdf)
Supplement: Supplfig2.pdf [file Supplfig2.pdf]

## Molecular Pharmacology

### The high affinity cAMP-specific phosphodiesterase 8B (PDE8B) controls steroidogenesis in the mouse adrenal gland

Li-Chun Lisa Tsai, Masami Shimizu-Albergine, and Joseph A. Beavo

#### Supplementary Figure 2

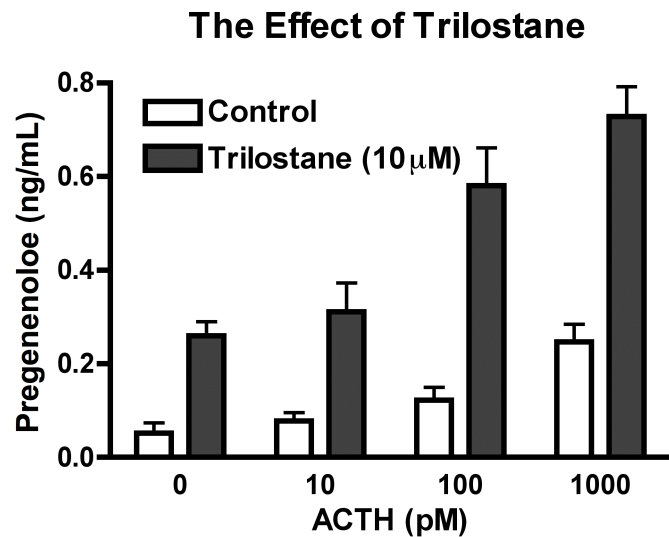

**Figure S2.** Trilostane, a  $3\beta$ HSD inhibitor, effectively increased pregnenolone concentration in Y-1 cells. Pregnenolone was produced upon ACTH-stimulation in a dose-dependent manner. The data are reported as means  $\pm$  SEM (N =3).
